# Supplementary material
Source: HighWire-hosted journal article supplement (https://www.cmajopen.ca/highwire/filestream/81348/field_highwire_adjunct_files/3/2019-0065-original-submission.pdf)
Supplement: 2019-0065-original-submission.pdf [file 2019-0065-original-submission.pdf]

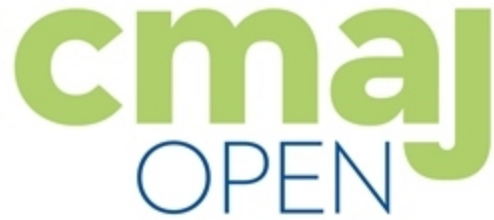

**Identifying Ontario geographic regions to assess adults who present to hospital with laboratory-defined conditions: a population-based study**

|                               |                                                                                                                                                                                                                                                                                                                                                                                                                                                                                                                                                                                                                                                                                                                                                                                                                                                                                                                                                                                                                                                                                                                                                                                                                                                                                                                                                                                                                                                                         |
|-------------------------------|-------------------------------------------------------------------------------------------------------------------------------------------------------------------------------------------------------------------------------------------------------------------------------------------------------------------------------------------------------------------------------------------------------------------------------------------------------------------------------------------------------------------------------------------------------------------------------------------------------------------------------------------------------------------------------------------------------------------------------------------------------------------------------------------------------------------------------------------------------------------------------------------------------------------------------------------------------------------------------------------------------------------------------------------------------------------------------------------------------------------------------------------------------------------------------------------------------------------------------------------------------------------------------------------------------------------------------------------------------------------------------------------------------------------------------------------------------------------------|
| Journal:                      | <i>CMAJ Open</i>                                                                                                                                                                                                                                                                                                                                                                                                                                                                                                                                                                                                                                                                                                                                                                                                                                                                                                                                                                                                                                                                                                                                                                                                                                                                                                                                                                                                                                                        |
| Manuscript ID                 | CMAJOpen-2019-0065                                                                                                                                                                                                                                                                                                                                                                                                                                                                                                                                                                                                                                                                                                                                                                                                                                                                                                                                                                                                                                                                                                                                                                                                                                                                                                                                                                                                                                                      |
| Manuscript Type:              | Cohort (retrospective)                                                                                                                                                                                                                                                                                                                                                                                                                                                                                                                                                                                                                                                                                                                                                                                                                                                                                                                                                                                                                                                                                                                                                                                                                                                                                                                                                                                                                                                  |
| Date Submitted by the Author: | 01-May-2019                                                                                                                                                                                                                                                                                                                                                                                                                                                                                                                                                                                                                                                                                                                                                                                                                                                                                                                                                                                                                                                                                                                                                                                                                                                                                                                                                                                                                                                             |
| Complete List of Authors:     | Iskander, Carina; Western University, Epidemiology & Biostatistics<br>McArthur, Eric; Institute for Clinical Evaluative Sciences,<br>Nash, Danielle; Institute for Clinical Evaluative Sciences,<br>Gandhi, Sonja; Sanofi Pasteur , Epidemiology and Benefit-Risk Evaluation<br>Weir, Matthew; Western University, Medicine<br>Muanda-Tsobo, Flory; Institute for Clinical Evaluative Sciences, ;<br>Western University, Nephrology<br>Garg, Amit X.; University of Western Ontario, Kidney Clinical Research Unit;                                                                                                                                                                                                                                                                                                                                                                                                                                                                                                                                                                                                                                                                                                                                                                                                                                                                                                                                                     |
| More Detailed Keywords:       |                                                                                                                                                                                                                                                                                                                                                                                                                                                                                                                                                                                                                                                                                                                                                                                                                                                                                                                                                                                                                                                                                                                                                                                                                                                                                                                                                                                                                                                                         |
| Keywords:                     | Epidemiology, Health services research                                                                                                                                                                                                                                                                                                                                                                                                                                                                                                                                                                                                                                                                                                                                                                                                                                                                                                                                                                                                                                                                                                                                                                                                                                                                                                                                                                                                                                  |
| Abstract:                     | <p>Background: To define geographic regions (forward sortation areas; FSAs) in Ontario, Canada from which people would likely present to a hospital linked to the Ontario Laboratories Information System (OLIS). Collectively, these geographic regions comprise a catchment area to assess adults who present to hospital with laboratory-defined conditions such as acute kidney injury, hyperkalemia and hyponatremia.</p> <p>Methods: This study was descriptive research using administrative data in Ontario, Canada from April 1, 2007 to December 31, 2017. The participants were adults who presented to the emergency department in the National Ambulatory Care Reporting System database for any reason. To assess changes over time, all emergency department visits were divided into fiscal quarters (i.e. April-June, July-September, October-December, January-March). The primary outcome measure was the proportion of people in a given FSA presenting to an emergency department at an OLIS-linked hospital (versus a non OLIS-linked hospital). To be included in the catchment area, at least 90% of all emergency department visits in a given quarter from a given FSA must have occurred at an OLIS-linked hospital.</p> <p>Results: By December 31, 2017, 323 out of 526 Ontario FSAs (61.4%) met the criteria to be in the catchment area. This represents a catchment population of approximately 8.5 million individuals in Ontario.</p> |

1  
2  
3  
4  
5  
6  
7  
8  
9  
10  
11  
12  
13  
14  
15  
16  
17  
18  
19  
20  
21  
22  
23  
24  
25  
26  
27  
28  
29  
30  
31  
32  
33  
34  
35  
36  
37  
38  
39  
40  
41  
42  
43  
44  
45  
46  
47  
48  
49  
50  
51  
52  
53  
54  
55  
56  
57  
58  
59  
60

|  |                                                                                                                                                                                                                                                       |
|--|-------------------------------------------------------------------------------------------------------------------------------------------------------------------------------------------------------------------------------------------------------|
|  | Interpretation: We successfully identified relevant Ontario geographic regions to assess adults presenting to hospital with conditions identified through hospital-based laboratory tests. Studies can now be conducted using these identified areas. |
|  |                                                                                                                                                                                                                                                       |

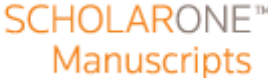

1  
2  
3  
4 **Identifying Ontario geographic regions to assess adults who present to hospital with**  
5 **laboratory-defined conditions: a population-based study**

6 *Carina Iskander, BMSc<sup>1</sup>; Eric McArthur, MSc<sup>2</sup>; Danielle M Nash, MSc, PhD<sup>1,2</sup>; Sonja Gandhi-*  
7 *Banga, PhD<sup>2,3</sup>; Matthew A Weir, MD, MSc<sup>2,4</sup>; Flory Tsobo Muanda, MD, PhD<sup>1,2</sup>; Amit X Garg,*  
8 *MD, PhD<sup>1,2</sup>*  
9  
10

11  
12  
13  
14 **Author Affiliations:**

- 15 1. Department of Epidemiology and Biostatistics, Western University, London, Canada  
16 2. ICES, Ontario, Canada  
17 3. Epidemiology and Benefit-Risk Evaluation, Sanofi Pasteur, Toronto, Canada  
18 4. Department of Medicine, Western University, London, Canada  
19  
20  
21

22  
23 **Corresponding Author:** Amit X Garg, MD, PhD ICES Western 800 Commissioners Rd. E.,  
24 Victoria Hospital, Room ELL-215. London, Ontario, Canada N6A 5W9 Tel: 519-685-8502.  
25 Email: [amit.garg@lhsc.on.ca](mailto:amit.garg@lhsc.on.ca)  
26  
27

28  
29 Competing interests: None declared.  
30  
31

32  
33 Word Count: 1,980 (excluding title page, abstract, references, figures & tables) 4,000 word limit  
34  
35  
36  
37  
38  
39  
40  
41  
42  
43  
44  
45  
46  
47  
48  
49  
50  
51  
52  
53  
54  
55  
56  
57  
58  
59  
60

## ABSTRACT

**Background:** To define geographic regions (forward sortation areas; FSAs) in Ontario, Canada from which people would likely present to a hospital linked to the Ontario Laboratories Information System (OLIS). Collectively, these geographic regions comprise a catchment area to assess adults who present to hospital with laboratory-defined conditions such as acute kidney injury, hyperkalemia and hyponatremia.

**Methods:** This study was descriptive research using administrative data in Ontario, Canada from April 1, 2007 to December 31, 2017. The participants were adults who presented to the emergency department in the National Ambulatory Care Reporting System database for any reason. To assess changes over time, all emergency department visits were divided into fiscal quarters (i.e. April-June, July-September, October-December, January-March). The primary outcome measure was the proportion of people in a given FSA presenting to an emergency department at an OLIS-linked hospital (versus a non OLIS-linked hospital). To be included in the catchment area, at least 90% of all emergency department visits in a given quarter from a given FSA must have occurred at an OLIS-linked hospital.

**Results:** By December 31, 2017, 323 out of 526 Ontario FSAs (61.4%) met the criteria to be in the catchment area. This represents a catchment population of approximately 8.5 million individuals in Ontario.

**Interpretation:** We successfully identified relevant Ontario geographic regions to assess adults presenting to hospital with conditions identified through hospital-based laboratory tests. Studies can now be conducted using these identified areas.

## INTRODUCTION

Health administrative databases are increasingly being used for population-based studies. (1) Typically, outcomes for these studies are assessed using diagnostic codes, which have limited accuracy for the identification of some laboratory-diagnosed conditions. (2–4) This may lead to non-differential outcome misclassification bias which underestimates the true estimate in these studies. (2) In Ontario, Canada, an important improvement in the diagnostic accuracy of laboratory-diagnosed conditions occurred in 2007 with the introduction of the Ontario Laboratories Information System (OLIS), an electronic repository of the province’s laboratory test results. (5) This system was implemented to allow healthcare providers timely access to laboratory test results from both community and hospital-based laboratories. The OLIS data has recently been linked to Ontario’s other healthcare administrative databases at ICES which provides opportunities for more accurate assessment of laboratory-diagnosed outcomes such as acute kidney injury, hyperkalemia and hyponatremia.

However, although OLIS was initiated in 2007, not all laboratories began submitting their data to OLIS simultaneously. Community laboratories began their contributions to OLIS from the outset, but hospital-based laboratories across the province began their contributions at various times since 2007, and to date, not all contribute. (6) According to eHealth Ontario, 134 of the 262 hospital sites across the province were using OLIS, and 13 out of 14 local health integration networks (LHIN) were included, as of December 31, 2017. (6,7) This variation presents a challenge when conducting retrospective population-based studies to assess laboratory-based outcomes during hospital encounters because depending on the date of assessment, the patient’s laboratory results may or may not be available in OLIS. We conducted this study to determine the geographic areas in Ontario from which people would likely present

1  
2  
3 to a hospital with laboratory data included in OLIS, and how these areas changed over time. We  
4  
5 used the resulting data to construct a date-dependent look-up table of geographic areas likely to  
6  
7 have hospital laboratory data available in OLIS.  
8  
9

## 11 12 **METHODS**

### 13 14 **Study design and research setting**

15  
16 We conducted this descriptive study using health administrative databases, which are linked  
17  
18 using unique encoded identifiers and analyzed at ICES in Ontario, Canada. All Ontario residents  
19  
20 receive universal access to physician services. The use of data in this project was authorized  
21  
22 under section 45 of Ontario's Personal Health Information Protection Act, which does not  
23  
24 require review by a Research Ethics Board. We have reported this study according to guidelines  
25  
26 for observational studies (Appendix 1). (8)  
27  
28  
29

30  
31 In Canada, geographic regions are defined by postal codes, which help postal operators sort  
32  
33 and deliver mail. A postal code is comprised of a combination of six characters that identify a  
34  
35 delivery unit. The postal code begins with a forward sortation area (FSA) comprised of the first  
36  
37 three characters of a postal code. The first unit represents the postal district, the second unit  
38  
39 represents whether the address is urban or rural and the third unit specifies a specific area within  
40  
41 a city or town. (9) According to the 2016 Census, Ontario has a total of 516 FSAs. (10)  
42  
43

### 44 45 **Data sources**

46  
47 We conducted this study using six linked datasets: (1) the Ontario Registered Persons Database,  
48  
49 which contains demographic information for all residents of Ontario, (2) the Canadian Institute  
50  
51 for Health Information Discharge Abstract Database, which contains hospital admission  
52  
53 diagnosis information for all persons in Ontario, (3) the National Ambulatory Care Reporting  
54  
55  
56  
57  
58  
59  
60

1  
2  
3 System Database, which contains information about emergency department visits, (4) the  
4  
5 Ontario Laboratories Information System Database, which contains information about laboratory  
6  
7 test results within the province, (5) the Ontario Health Insurance Plan Database, which contains  
8  
9 health claims information for both inpatient and outpatient physician services, (6) and the Same  
10  
11 Day Surgery Database, which contains information on day surgery visits in Ontario.  
12  
13

### 14 **Cohort assembly**

15  
16 We assembled a cohort of adults, aged 18 years or older, who presented to the emergency  
17  
18 department in the National Ambulatory Care Reporting System database for any reason between  
19  
20 April 1, 2007 to December 31, 2017. We divided the cohort into fiscal quarters (April 1-June 30,  
21  
22 July 1- September 30, October 1- December 31, January 1- March 31). We excluded multiple  
23  
24 emergency department visits by an individual patient within each quarter. As data cleaning steps,  
25  
26 we also excluded emergency department visits if there was missing information on the  
27  
28 individual's age or sex, if there was a recorded death date on or before the emergency  
29  
30 department visit date, or if the individual was a non-Ontario resident.  
31  
32  
33

### 34 **Identifying OLIS-linked versus non-OLIS-linked hospitals over time**

35  
36 Using data from eHealth Ontario, we assembled a list of Ontario hospitals and the fiscal quarter  
37  
38 when they started contributing data to OLIS.(6) To more precisely identify the date a  
39  
40 contribution began, we searched the OLIS database at ICES for serum creatinine values (a  
41  
42 commonly ordered laboratory test) arising from specific hospital laboratories using the unique  
43  
44 Canadian Institute for Health Information institution numbers housed at ICES. We categorized  
45  
46 hospitals as "OLIS-linked" beginning on the date their laboratory data began to populate the  
47  
48 OLIS database and we considered them "non-linked" prior to that date. Hospitals that had not  
49  
50  
51  
52  
53  
54  
55  
56  
57  
58  
59  
60

1  
2  
3 contributed data to OLIS prior to December 31, 2017 were considered non-linked hospitals for  
4  
5 the entire study period.  
6

### 7 **Identifying the OLIS catchment area**

8  
9  
10 After determining which hospitals contributed to OLIS and when they started doing so, we  
11  
12 sought to determine the geographic areas likely to be served by OLIS-linked hospitals (i.e. the  
13  
14 catchment area). To determine a hospital's catchment area, we identified the home location of  
15  
16 the patients (based on FSA) presenting to their emergency departments. We assigned an FSA to  
17  
18 an OLIS-linked hospital if the hospital received 90% or more of the emergency department visits  
19  
20 arising from that FSA in a given fiscal quarter. Using these criteria, we generated a list of all  
21  
22 eligible FSAs and the initial date for joining the catchment area. We then produced an interactive  
23  
24 Shiny application with a map showing the change in the OLIS catchment area over time using  
25  
26 RStudio (RStudio, Inc., Boston, MA) and the leaflet package. All other analyses were conducted  
27  
28 using SAS version 9.4 (SAS Institute, Cary, NC).  
29  
30  
31  
32  
33  
34

## 35 **RESULTS**

36  
37 A flow diagram describing catchment area ascertainment between 2007 and 2017 in Ontario is  
38  
39 shown in Figure 1. As of December 31, 2017, there were 323 out of 526 total FSAs (61.4%)  
40  
41 included in the catchment area (see Appendix 2 for a list of all eligible FSAs and the initial date  
42  
43 for joining the catchment area). Approximately 8.5 million individuals resided within the FSAs  
44  
45 in the catchment area of OLIS-linked hospitals. Baseline characteristics of people residing within  
46  
47 the catchment areas of OLIS-linked hospitals are shown in comparison to individuals residing in  
48  
49 the catchments of unlinked hospitals (Table 1). On December 31, 2017, the two groups were  
50  
51 similar across selected demographic characteristics and comorbidities (Table 1).  
52  
53  
54  
55  
56  
57  
58  
59  
60



**Table 1.** Baseline characteristics of individuals within the geographic catchment area compared to individuals residing outside the catchment area on December 31, 2017.

|                                                     | <b>Individuals outside<br/>catchment area</b><br>N=4,739,202 | <b>Individuals within<br/>catchment area</b><br>N=8,511,875 | <b>Standardized<br/>Difference</b> |
|-----------------------------------------------------|--------------------------------------------------------------|-------------------------------------------------------------|------------------------------------|
| <b>Demographics</b>                                 |                                                              |                                                             |                                    |
| Women, N (%)                                        | 2,380,493 (50.2%)                                            | 4,318,779 (50.7%)                                           | 1%                                 |
| Rural, N (%)                                        | 514,721 (10.9%)                                              | 883,021 (10.4%)                                             | 2%                                 |
| Age, mean (SD), years                               | 49.00 ± 18.52                                                | 48.35 ± 18.24                                               | 4%                                 |
| Age, median (IQR), years                            | 49 (34-62)                                                   | 48 (33-61)                                                  | 4%                                 |
| Age, N (%), years                                   |                                                              |                                                             |                                    |
| 18 - <35                                            | 1,260,590 (26.6%)                                            | 2,309,996 (27.1%)                                           | 0%                                 |
| 35 - <45                                            | 761,956 (16.1%)                                              | 1,457,822 (17.1%)                                           | 1%                                 |
| 45 - <55                                            | 865,243 (18.3%)                                              | 1,599,389 (18.8%)                                           | 1%                                 |
| 55 - <65                                            | 825,632 (17.4%)                                              | 1,434,415 (16.9%)                                           | 0%                                 |
| 65 - <75                                            | 567,124 (12.0%)                                              | 948,119 (11.1%)                                             | 1%                                 |
| 75 - <85                                            | 303,503 (6.4%)                                               | 500,634 (5.9%)                                              | 1%                                 |
| 85 - <95                                            | 132,614 (2.8%)                                               | 219,658 (2.6%)                                              | 1%                                 |
| ≥95                                                 | 22,540 (0.5%)                                                | 41,842 (0.5%)                                               | 0%                                 |
| Income quintile, N (%)                              |                                                              |                                                             |                                    |
| 1 (lowest)                                          | 998,131 (21.1%)                                              | 1,539,627 (18.1%)                                           | 7%                                 |
| 2                                                   | 944,928 (19.9%)                                              | 1,629,030 (19.1%)                                           | 2%                                 |
| 3                                                   | 896,788 (18.9%)                                              | 1,704,263 (20.0%)                                           | 3%                                 |
| 4                                                   | 929,142 (19.6%)                                              | 1,851,508 (21.8%)                                           | 5%                                 |
| 5 (highest)                                         | 946,006 (20.0%)                                              | 1,750,267 (20.6%)                                           | 1%                                 |
| <b>Comorbidities in the<br/>past 5 years, N (%)</b> |                                                              |                                                             |                                    |
| Hypertension                                        | 1,084,337 (22.9%)                                            | 1,863,194 (21.9%)                                           | 2%                                 |
| Diabetes                                            | 541,778 (11.4%)                                              | 1,011,328 (11.9%)                                           | 1%                                 |
| Chronic kidney disease                              | 144,924 (3.1%)                                               | 243,818 (2.9%)                                              | 1%                                 |
| Congestive heart failure                            | 112,954 (2.4%)                                               | 164,019 (1.9%)                                              | 3%                                 |
| Major cancers                                       | 201,358 (4.2%)                                               | 357,584 (4.2%)                                              | 0%                                 |

<sup>a</sup>Missing rural status was categorized as not rural.

<sup>b</sup>Missing income quintile was imputed into the third quintile.

<sup>c</sup>Standardized differences are less sensitive to sample size than traditional hypothesis tests. They provide a measure of the difference between the groups divided by the pooled SD; a value >10% is interpreted as a meaningful difference between the groups (11).

An interactive map of Ontario is shown at this link: <https://ericm.shinyapps.io/olis/>. The

geographic catchment area continues to grow and expand across the province as more hospitals

join OLIS. A static map of the OLIS catchment area, as of December 31, 2017, is depicted in

Figure 2.

## INTERPRETATION

In this study we established the geographic catchment areas of hospitals with laboratory data available through OLIS and determined the temporal changes in these areas. We found over time there was an increase in the number of OLIS-eligible hospitals, with an associated increase in the number of FSAs included in the total OLIS-linked catchment area. It is reassuring that the characteristics of individuals within the catchment area are similar to individuals living outside of it, suggesting results from future studies restricted to the OLIS catchment area should be generalizable to the entire Ontario population. Our study's findings will be a pivotal component of future studies seeking to assess laboratory-diagnosed outcomes among patients admitted to hospital, such as acute kidney injury related to drug exposure. (12)

A strength of this study was our use of emergency department visits to establish hospital catchments, rather than inpatient hospitalizations, which may not represent the local hospital closest to the patient since people may travel further to receive specialized services. This method reduced the risk of outcome misclassification bias, as we likely captured a set of eligible FSAs for a particular hospital that a patient would present to. A limitation to this approach is that we will not capture some individuals who are transferred and admitted to a hospital outside of their local catchment area. The reliability of our findings is supported by the large number of emergency department visits across the entire province to form the basis of catchment area ascertainment. Additionally, there were very few eligibility restrictions, as all adults permanently residing in Ontario were considered for study inclusion.

A limitation of this study was that there were some discrepancies between the fiscal quarter dates provided by the eHealth Ontario website and the dates that the laboratory test results first appeared in OLIS data. Thus, we assumed the correct dates were the dates provided in the OLIS database. Another limitation was that we determined catchment areas if at least 90%

1  
2  
3 of people from a given FSA with an emergency department visit presented at an OLIS-linked  
4 hospital, so not all persons residing in a catchment area visited an OLIS-linked hospital. This  
5 introduces the small risk of non-differential outcome misclassification bias for studies that use  
6 this catchment area to define their study populations, which may underestimate the true effect.  
7  
8 Another consideration is that hospitals within Ontario are continually joining OLIS, thus, updates  
9 to this catchment area will be needed in the future.

10  
11  
12 This study builds on previous work done in Ontario which used common electronic  
13 medical laboratory data from 12 hospitals to define geographic catchment regions within  
14 Southwestern Ontario (Cerner system). (13) Since the publication of this paper, there have been a  
15 number of population-based cohort studies using the defined Cerner catchment area, which  
16 assessed the risk for hospitalization with rhabdomyolysis after statin use, the risk of acute kidney  
17 injury after co-prescription of clarithromycin compared with azithromycin in individuals taking a  
18 calcium-channel blocker, and hyponatremia following the use of antidepressant and antiepileptic  
19 drugs. (12,14–16) The results of this study can be used in future research to form the basis of  
20 assessing OLIS-linked laboratory outcomes.

## 21 22 23 24 25 26 27 28 29 30 31 32 33 34 35 36 37 **FUNDING**

38  
39  
40 This study was supported by the ICES Western site. ICES is funded by an annual grant from the  
41 Ontario Ministry of Health and Long-Term Care (MOHLTC). Core funding for ICES Western is  
42 provided by the Academic Medical Organization of Southwestern Ontario (AMOSO), the  
43 Schulich School of Medicine and Dentistry (SSMD), Western University, and the Lawson Health  
44 Research Institute (LHRI). The research was conducted by members of the ICES Kidney,  
45 Dialysis and Transplantation team, at the ICES Western facility, who are supported by a grant  
46 from the Canadian Institutes of Health Research (CIHR). Dr. Amit Garg was supported by the  
47  
48  
49  
50  
51  
52  
53  
54  
55  
56  
57  
58  
59  
60

1  
2  
3 Dr. Adam Linton Chair in Kidney Health Analytics and a CIHR Clinician Investigator  
4  
5 Award. The opinions, results and conclusions are those of the authors and are independent from  
6  
7 the funding sources. No endorsement by ICES, AMOSO, SSMD, LHRI, CIHR, or the MOHLTC  
8  
9 is intended or should be inferred.  
10

## 11 12 **CONTRIBUTORS**

13  
14 Carina Iskander, Eric McArthur, Danielle Nash, Sonja Gandhi-Banga and Amit Garg designed  
15  
16 the study. Eric McArthur analyzed the data. Carina Iskander wrote the manuscript and all other  
17  
18 authors revised it for important intellectual content. All authors gave final approval of the  
19  
20 version to be published and agreed to be accountable for all aspects of the work. Additionally,  
21  
22 we thank Alexandra Ouedraogo, at ICES Western in London, Ontario, for graphing contributions  
23  
24 to this article.  
25  
26  
27  
28  
29  
30  
31  
32  
33  
34  
35  
36  
37  
38  
39  
40  
41  
42  
43  
44  
45  
46  
47  
48  
49  
50  
51  
52  
53  
54  
55  
56  
57  
58  
59  
60

## REFERENCES

1. Goel V, Williams J, Anderson G, Blackstien-Hirsch P, Fooks C, Naylor C. Patterns of Health Care in Ontario [Internet]. The ICES Practice Atlas. 1996. Available from: <http://www.ices.on.ca/Publications/Atlases-and-Reports/1996/Patterns-of-health-care-2nd-ed>
2. Hwang YJ, Shariff SZ, Gandhi S, Wald R, Clark E, Fleet JL, et al. Validity of the International Classification of Diseases, Tenth Revision code for acute kidney injury in elderly patients at presentation to the emergency department and at hospital admission. *BMJ Open*. 2012;2(6).
3. Fleet JL, Shariff SZ, Gandhi S, Weir MA, Jain AK, Garg AX. Validity of the International Classification of Diseases 10th revision code for hyperkalaemia in elderly patients at presentation to an emergency department and at hospital admission. *BMJ Open*. 2012;2(6).
4. Gandhi S, Shariff SZ, Fleet JL, Weir MA, Jain AK, Garg AX. Validity of the International Classification of Diseases 10th revision code for hospitalisation with hyponatraemia in elderly patients. *BMJ Open*. 2012;2(6).
5. eHealth Ontario. Ontario Laboratories Information System [Internet]. Available from: <https://www.ehealthontario.on.ca/en/for-healthcare-professionals/ontario-laboratories-information-system-olis>
6. Ontario Laboratories Information System. OLIS - Data Contributors. 2018. p. 9–10.
7. Ontario Hospital Association. Your Hospitals [Internet]. [cited 2019 Feb 11]. Available from: <https://www.oha.com/your-hospitals>
8. Benchimol EI, Smeeth L, Guttman A, Harron K, Moher D, Petersen I, et al. The REporting of studies Conducted using Observational Routinely-collected health Data (RECORD) statement. *PLoS Med*. 2015;12(10):e1001885.
9. Canada Post. Canada Post: Addressing Guidelines, Forward sortation areas - The first segment of the postal code [Internet]. [cited 2018 May 15]. Available from: <https://www.canadapost.ca/tools/pg/manual/PGaddress-e.asp#1449304>
10. Statistics Canada Catalogue. Forward Sortation Area Boundary File, Reference Guide. 2011. p. 1–32.
11. Austin PC. Using the standardized difference to compare the prevalence of a binary variable between two groups in observational research. *Commun Stat Comput*. 2009;38(6):1228–34.
12. Patel AM, Shariff S, Bailey DG, Jurlink DN, Gandhi S, Mamdani M, et al. Statin toxicity from macrolide antibiotic coprescription: a population-based cohort study. *Ann Intern Med*. 2013 Jun;158(12):869–76.
13. Gandhi S, Shariff SZ, Beyea MM, Weir MA, Hands T, Kearns G, et al. Identifying geographical regions serviced by hospitals to assess laboratory-based outcomes. *BMJ Open*. 2013 Jan;3(1).
14. Gandhi S, Fleet JL, Bailey DG, McArthur E, Wald R, Rehman F, et al. Calcium-channel blocker-clarithromycin drug interactions and acute kidney injury. *JAMA*. 2013 Dec;310(23):2544–53.
15. Gandhi S, Shariff SZ, Al-Jaishi A, Reiss JP, Mamdani MM, Hackam DG, et al. Second-Generation Antidepressants and Hyponatremia Risk: A Population-Based Cohort Study of Older Adults. *Am J Kidney Dis*. 2017 Jan;69(1):87–96.

- 1  
2  
3 16. Gandhi S, McArthur E, Mamdani MM, Hackam DG, McLachlan RS, Weir MA, et al.  
4 Antiepileptic drugs and hyponatremia in older adults: Two population-based cohort  
5 studies. *Epilepsia*. 2016 Dec;57(12):2067–79.  
6  
7  
8  
9

10 **Figure 1.** Flow chart describing catchment ascertainment between April 1, 2007 and December  
11 31, 2017 in Ontario.  
12

13 **Figure 2.** Representation of all OLIS eligible catchment regions in Ontario by December 31,  
14 2017.  
15  
16  
17  
18  
19  
20  
21  
22  
23  
24  
25  
26  
27  
28  
29  
30  
31  
32  
33  
34  
35  
36  
37  
38  
39  
40  
41  
42  
43  
44  
45  
46  
47  
48  
49  
50  
51  
52  
53  
54  
55  
56  
57  
58  
59  
60

Confidential

1  
2  
3  
4  
5  
6  
7  
8  
9  
10  
11  
12  
13  
14  
15  
16  
17  
18  
19  
20  
21  
22  
23  
24  
25  
26  
27  
28  
29  
30  
31  
32  
33  
34  
35  
36  
37  
38  
39  
40  
41  
42  
43  
44  
45  
46  
47  
48  
49  
50  
51  
52  
53  
54  
55  
56  
57  
58  
59  
60

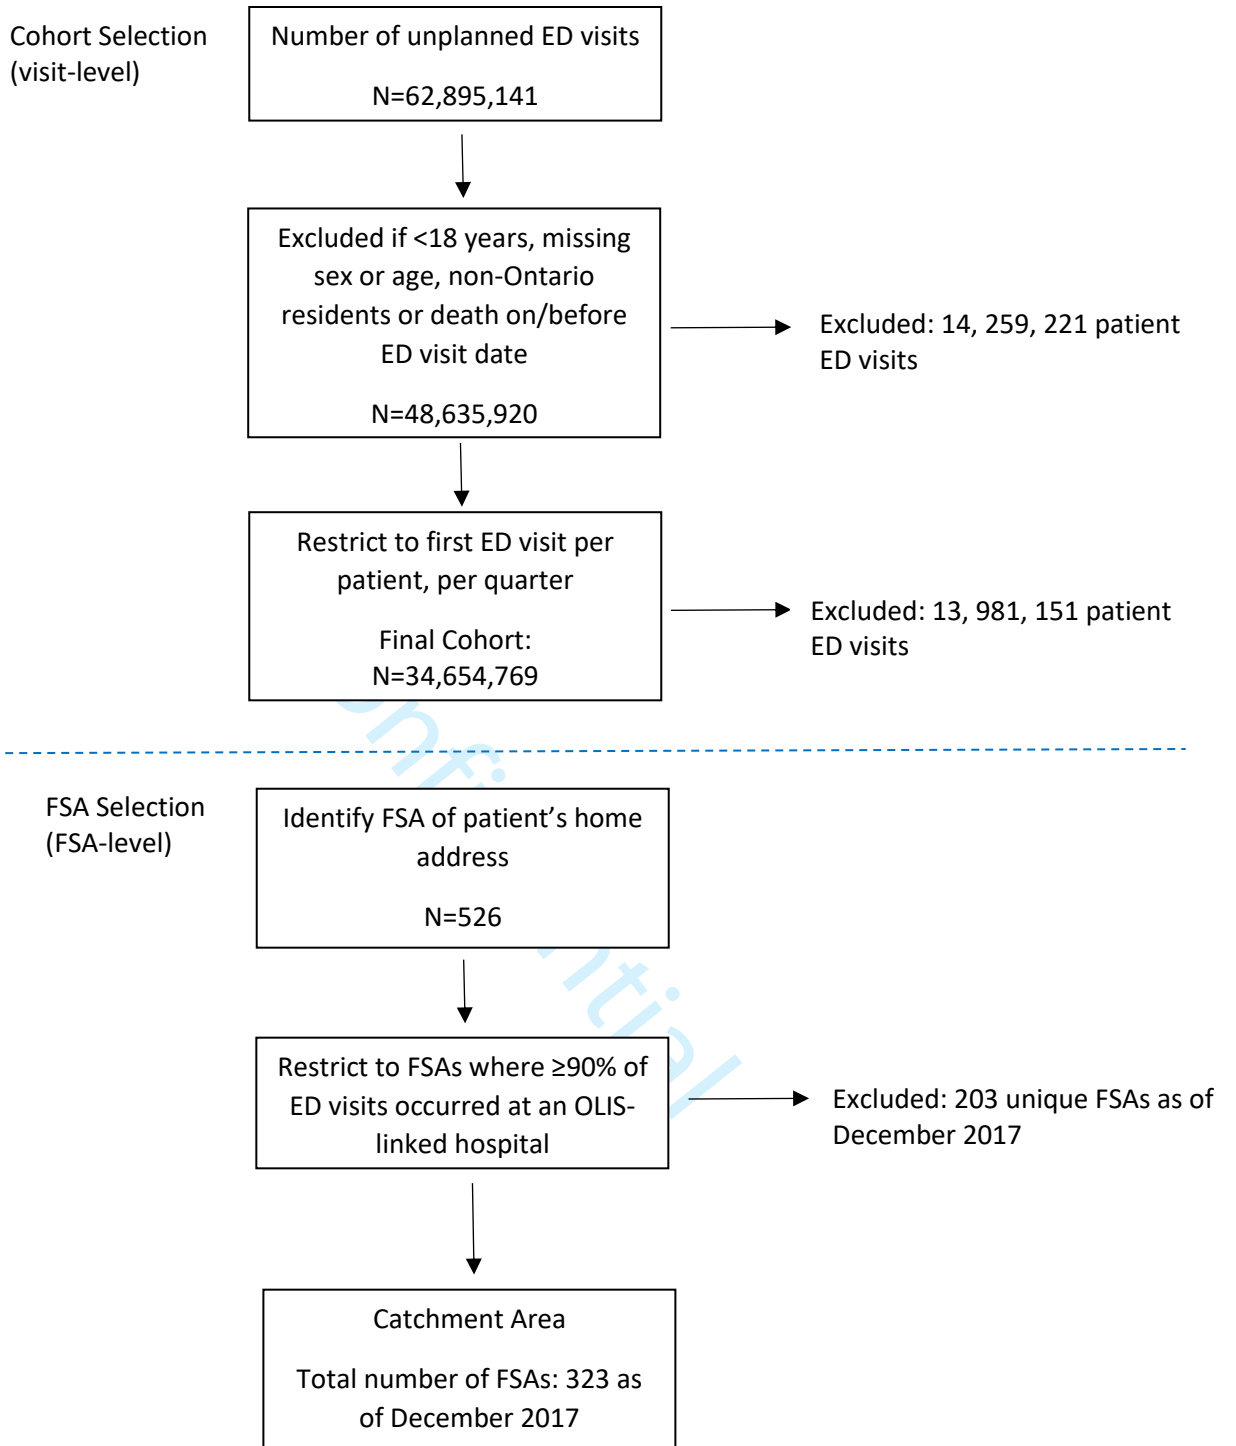

1  
2  
3  
4  
5  
6  
7  
8  
9  
10  
11  
12  
13  
14  
15  
16  
17  
18  
19  
20  
21  
22  
23  
24  
25  
26  
27  
28  
29  
30  
31  
32  
33  
34  
35  
36  
37  
38  
39  
40  
41  
42  
43  
44  
45  
46  
47  
48  
49  
50  
51  
52  
53  
54  
55  
56  
57  
58  
59  
60

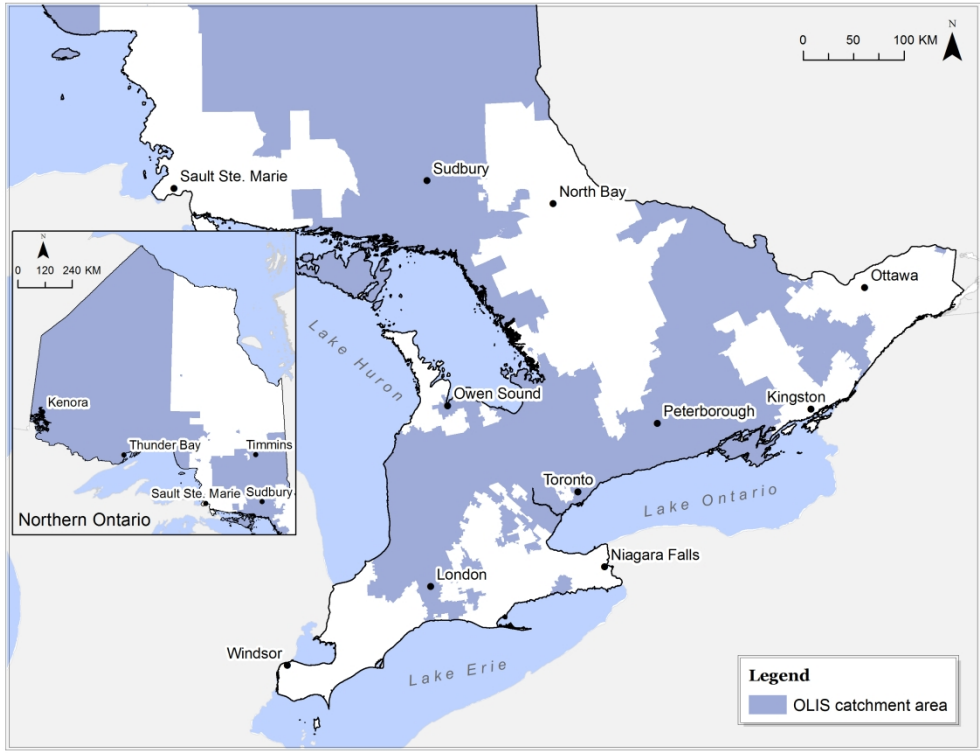

Figure 2. Representation of all OLIS eligible catchment regions in Ontario by December 31, 2017.

279x215mm (300 x 300 DPI)



## Appendix 1. RECORD Checklist

|                           | Item No. | STROBE items                                                                                                                                                                                                          | Location in manuscript where items are reported | RECORD items                                                                                                                                                                                                                                                                                                                                                                                                                                            | Location in manuscript where items are reported |
|---------------------------|----------|-----------------------------------------------------------------------------------------------------------------------------------------------------------------------------------------------------------------------|-------------------------------------------------|---------------------------------------------------------------------------------------------------------------------------------------------------------------------------------------------------------------------------------------------------------------------------------------------------------------------------------------------------------------------------------------------------------------------------------------------------------|-------------------------------------------------|
| <b>Title and abstract</b> |          |                                                                                                                                                                                                                       |                                                 |                                                                                                                                                                                                                                                                                                                                                                                                                                                         |                                                 |
|                           | 1        | (a) Indicate the study's design with a commonly used term in the title or the abstract<br><br>(b) Provide in the abstract an informative and balanced summary of what was done and what was found                     | Abstract<br><br>Abstract                        | RECORD 1.1: The type of data used should be specified in the title or abstract. When possible, the name of the databases used should be included.<br><br>RECORD 1.2: If applicable, the geographic region and timeframe within which the study took place should be reported in the title or abstract.<br><br>RECORD 1.3: If linkage between databases was conducted for the study, this should be clearly stated in the title or abstract.             | Title<br><br>Abstract<br><br>N/A                |
| <b>Introduction</b>       |          |                                                                                                                                                                                                                       |                                                 |                                                                                                                                                                                                                                                                                                                                                                                                                                                         |                                                 |
| Background rationale      | 2        | Explain the scientific background and rationale for the investigation being reported                                                                                                                                  | Introduction                                    |                                                                                                                                                                                                                                                                                                                                                                                                                                                         |                                                 |
| Objectives                | 3        | State specific objectives, including any prespecified hypotheses                                                                                                                                                      | Introduction                                    |                                                                                                                                                                                                                                                                                                                                                                                                                                                         |                                                 |
| <b>Methods</b>            |          |                                                                                                                                                                                                                       |                                                 |                                                                                                                                                                                                                                                                                                                                                                                                                                                         |                                                 |
| Study Design              | 4        | Present key elements of study design early in the paper                                                                                                                                                               | Methods                                         |                                                                                                                                                                                                                                                                                                                                                                                                                                                         |                                                 |
| Setting                   | 5        | Describe the setting, locations, and relevant dates, including periods of recruitment, exposure, follow-up, and data collection                                                                                       | Methods                                         |                                                                                                                                                                                                                                                                                                                                                                                                                                                         |                                                 |
| Participants              | 6        | (a) Give the eligibility criteria, and the sources and methods of selection of participants. Describe methods of follow-up<br><br>(b) For matched studies, give matching criteria and number of exposed and unexposed | Methods<br><br>N/A                              | RECORD 6.1: The methods of study population selection (such as codes or algorithms used to identify subjects) should be listed in detail. If this is not possible, an explanation should be provided.<br><br>RECORD 6.2: Any validation studies of the codes or algorithms used to select the population should be referenced. If validation was conducted for this study and not published elsewhere, detailed methods and results should be provided. | Methods<br><br>N/A<br><br>N/A                   |

|                                  |    |                                                                                                                                                                                                                                                                                                                                        |                                                     |                                                                                                                                                                                                                                |                    |
|----------------------------------|----|----------------------------------------------------------------------------------------------------------------------------------------------------------------------------------------------------------------------------------------------------------------------------------------------------------------------------------------|-----------------------------------------------------|--------------------------------------------------------------------------------------------------------------------------------------------------------------------------------------------------------------------------------|--------------------|
|                                  |    |                                                                                                                                                                                                                                                                                                                                        |                                                     | RECORD 6.3: If the study involved linkage of databases, consider use of a flow diagram or other graphical display to demonstrate the data linkage process, including the number of individuals with linked data at each stage. |                    |
| Variables                        | 7  | Clearly define all outcomes, exposures, predictors, potential confounders, and effect modifiers. Give diagnostic criteria, if applicable.                                                                                                                                                                                              | Methods                                             | RECORD 7.1: A complete list of codes and algorithms used to classify exposures, outcomes, confounders, and effect modifiers should be provided. If these cannot be reported, an explanation should be provided.                | Methods            |
| Data sources/<br>measurement     | 8  | For each variable of interest, give sources of data and details of methods of assessment (measurement). Describe comparability of assessment methods if there is more than one group                                                                                                                                                   | Methods                                             |                                                                                                                                                                                                                                |                    |
| Bias                             | 9  | Describe any efforts to address potential sources of bias                                                                                                                                                                                                                                                                              | Discussion                                          |                                                                                                                                                                                                                                |                    |
| Study size                       | 10 | Explain how the study size was arrived at                                                                                                                                                                                                                                                                                              | Methods                                             |                                                                                                                                                                                                                                |                    |
| Quantitative variables           | 11 | Explain how quantitative variables were handled in the analyses. If applicable, describe which groupings were chosen, and why                                                                                                                                                                                                          | Methods                                             |                                                                                                                                                                                                                                |                    |
| Statistical methods              | 12 | (a) Describe all statistical methods, including those used to control for confounding<br><br>(b) Describe any methods used to examine subgroups and interactions<br><br>(c) Explain how missing data were addressed<br><br>(d) If applicable, explain how loss to follow-up was addressed<br><br>(e) Describe any sensitivity analyses | Methods<br><br>N/A<br><br>N/A<br><br>N/A<br><br>N/A |                                                                                                                                                                                                                                |                    |
| Data access and cleaning methods |    | ..                                                                                                                                                                                                                                                                                                                                     |                                                     | RECORD 12.1: Authors should describe the extent to which the investigators had access to the database population used to create the study population.<br><br>RECORD 12.2: Authors should provide information on the data       | Methods<br><br>N/A |

|                  |    |                                                                                                                                                                                                                                                                                                                                   |                                          |                                                                                                                                                                                                                                                                                                                    |                       |
|------------------|----|-----------------------------------------------------------------------------------------------------------------------------------------------------------------------------------------------------------------------------------------------------------------------------------------------------------------------------------|------------------------------------------|--------------------------------------------------------------------------------------------------------------------------------------------------------------------------------------------------------------------------------------------------------------------------------------------------------------------|-----------------------|
|                  |    |                                                                                                                                                                                                                                                                                                                                   |                                          | cleaning methods used in the study.                                                                                                                                                                                                                                                                                |                       |
| Linkage          |    | ..                                                                                                                                                                                                                                                                                                                                |                                          | RECORD 12.3: State whether the study included person-level, institutional-level, or other data linkage across two or more databases. The methods of linkage and methods of linkage quality evaluation should be provided.                                                                                          | Methods               |
| <b>Results</b>   |    |                                                                                                                                                                                                                                                                                                                                   |                                          |                                                                                                                                                                                                                                                                                                                    |                       |
| Participants     | 13 | (a) Report the numbers of individuals at each stage of the study ( <i>e.g.</i> , numbers potentially eligible, examined for eligibility, confirmed eligible, included in the study, completing follow-up, and analysed)<br><br>(b) Give reasons for non-participation at each stage.<br><br>(c) Consider use of a flow diagram    | Figure 1<br><br>Figure 1<br><br>Figure 1 | RECORD 13.1: Describe in detail the selection of the persons included in the study ( <i>i.e.</i> , study population selection) including filtering based on data quality, data availability and linkage. The selection of included persons can be described in the text and/or by means of the study flow diagram. | Methods –<br>Figure 1 |
| Descriptive data | 14 | (a) Give characteristics of study participants ( <i>e.g.</i> , demographic, clinical, social) and information on exposures and potential confounders<br><br>(b) Indicate the number of participants with missing data for each variable of interest<br><br>(c) Summarise follow-up time ( <i>e.g.</i> , average and total amount) | Table 1<br><br>N/A<br><br>N/A            |                                                                                                                                                                                                                                                                                                                    |                       |
| Outcome data     | 15 | Report numbers of outcome events or summary measures over time                                                                                                                                                                                                                                                                    | Results                                  |                                                                                                                                                                                                                                                                                                                    |                       |
| Main results     | 16 | (a) Give unadjusted estimates and, if applicable, confounder-adjusted estimates and their precision ( <i>e.g.</i> , 95% confidence interval). Make clear which confounders were adjusted for and why they were included<br><br>(b) Report category boundaries when continuous variables were categorized                          | N/A<br><br>N/A                           |                                                                                                                                                                                                                                                                                                                    |                       |

|                                                           |    |                                                                                                                                                                            |            |                                                                                                                                                                                                                                                                                                          |            |
|-----------------------------------------------------------|----|----------------------------------------------------------------------------------------------------------------------------------------------------------------------------|------------|----------------------------------------------------------------------------------------------------------------------------------------------------------------------------------------------------------------------------------------------------------------------------------------------------------|------------|
|                                                           |    | (c) If relevant, consider translating estimates of relative risk into absolute risk for a meaningful time period                                                           | N/A        |                                                                                                                                                                                                                                                                                                          |            |
| Other analyses                                            | 17 | Report other analyses done—e.g., analyses of subgroups and interactions, and sensitivity analyses                                                                          | N/A        |                                                                                                                                                                                                                                                                                                          |            |
| <b>Discussion</b>                                         |    |                                                                                                                                                                            |            |                                                                                                                                                                                                                                                                                                          |            |
| Key results                                               | 18 | Summarise key results with reference to study objectives                                                                                                                   | Discussion |                                                                                                                                                                                                                                                                                                          |            |
| Limitations                                               | 19 | Discuss limitations of the study, taking into account sources of potential bias or imprecision. Discuss both direction and magnitude of any potential bias                 | Discussion | RECORD 19.1: Discuss the implications of using data that were not created or collected to answer the specific research question(s). Include discussion of misclassification bias, unmeasured confounding, missing data, and changing eligibility over time, as they pertain to the study being reported. | Discussion |
| Interpretation                                            | 20 | Give a cautious overall interpretation of results considering objectives, limitations, multiplicity of analyses, results from similar studies, and other relevant evidence | Discussion |                                                                                                                                                                                                                                                                                                          |            |
| Generalisability                                          | 21 | Discuss the generalisability (external validity) of the study results                                                                                                      | Discussion |                                                                                                                                                                                                                                                                                                          |            |
| <b>Other Information</b>                                  |    |                                                                                                                                                                            |            |                                                                                                                                                                                                                                                                                                          |            |
| Funding                                                   | 22 | Give the source of funding and the role of the funders for the present study and, if applicable, for the original study on which the present article is based              | Funding    |                                                                                                                                                                                                                                                                                                          |            |
| Accessibility of protocol, raw data, and programming code |    | ..                                                                                                                                                                         |            | RECORD 22.1: Authors should provide information on how to access any supplemental information such as the study protocol, raw data, or programming code.                                                                                                                                                 | N/A        |

**Appendix 2.** FSAs to be included in the catchment area

| <b>FSA</b> | <b>Eligibility Date</b> |
|------------|-------------------------|
| K0G        | 01-Jan-16               |
| K0J        | 01-Jan-16               |
| K0K        | 01-Oct-15               |
| K0L        | 01-Oct-15               |
| K6A        | 01-Apr-15               |
| K6T        | 01-Oct-15               |
| K6V        | 01-Oct-15               |
| K7A        | 01-Oct-15               |
| K7C        | 01-Oct-15               |
| K7H        | 01-Oct-15               |
| K7R        | 01-Jan-16               |
| K7S        | 01-Oct-15               |
| K7V        | 01-Jan-16               |
| K8A        | 01-Jul-15               |
| K8B        | 01-Jul-15               |
| K8H        | 01-Jul-15               |
| K8N        | 01-Oct-15               |
| K8P        | 01-Oct-15               |
| K8R        | 01-Oct-15               |
| K8V        | 01-Oct-15               |
| K9A        | 01-Jul-14               |
| K9H        | 01-Jul-14               |
| K9J        | 01-Jul-14               |
| K9K        | 01-Jul-14               |
| K9L        | 01-Jul-14               |
| K9V        | 01-Apr-14               |
| LOA        | 01-Jul-14               |
| LOB        | 01-Apr-14               |
| LOC        | 01-Jul-14               |
| LOE        | 01-Jul-14               |
| LOG        | 01-Apr-15               |
| LOH        | 01-Oct-14               |
| LOJ        | 01-Oct-15               |
| LOK        | 01-Apr-16               |
| LOL        | 01-Apr-16               |
| LOM        | 01-Jul-16               |
| LON        | 01-Oct-16               |
| LOP        | 01-Jan-17               |
| L1A        | 01-Jul-14               |
| L1B        | 01-Jul-13               |
| L1C        | 01-Jan-08               |
| L1E        | 01-Jan-14               |
| L1G        | 01-Apr-08               |

Confidential

1  
2  
3  
4  
5  
6  
7  
8  
9  
10  
11  
12  
13  
14  
15  
16  
17  
18  
19  
20  
21  
22  
23  
24  
25  
26  
27  
28  
29  
30  
31  
32  
33  
34  
35  
36  
37  
38  
39  
40  
41  
42  
43  
44  
45  
46  
47  
48  
49  
50  
51  
52  
53  
54  
55  
56  
57  
58  
59  
60

|     |           |
|-----|-----------|
| L1H | 01-Jul-11 |
| L1J | 01-Apr-12 |
| L1K | 01-Jan-14 |
| L1L | 01-Jan-14 |
| L1M | 01-Oct-14 |
| L1N | 01-Apr-14 |
| L1P | 01-Apr-14 |
| L1R | 01-Apr-14 |
| L1S | 01-Apr-14 |
| L1T | 01-Apr-14 |
| L1V | 01-Apr-14 |
| L1W | 01-Apr-14 |
| L1X | 01-Jul-14 |
| L1Y | 01-Oct-14 |
| L1Z | 01-Apr-14 |
| L3P | 01-Oct-14 |
| L3R | 01-Oct-14 |
| L3S | 01-Oct-14 |
| L3T | 01-Apr-14 |
| L3V | 01-Jan-15 |
| L3X | 01-Apr-13 |
| L3Y | 01-Apr-12 |
| L3Z | 01-Jan-14 |
| L4A | 01-Oct-14 |
| L4B | 01-Apr-14 |
| L4C | 01-Apr-13 |
| L4E | 01-Apr-13 |
| L4G | 01-Apr-13 |
| L4H | 01-Oct-15 |
| L4J | 01-Apr-14 |
| L4K | 01-Oct-15 |
| L4M | 01-Oct-15 |
| L4N | 01-Oct-15 |
| L4P | 01-Apr-13 |
| L4R | 01-Apr-16 |
| L4S | 01-Apr-13 |
| L4T | 01-Apr-14 |
| L4V | 01-Apr-08 |
| L4W | 01-Jul-13 |
| L4X | 01-Jan-14 |
| L4Y | 01-Jul-13 |
| L4Z | 01-Jul-13 |
| L5A | 01-Jul-13 |
| L5B | 01-Jul-13 |
| L5C | 01-Jul-13 |
| L5E | 01-Jan-14 |

Confidential

|     |           |
|-----|-----------|
| L5G | 01-Jul-13 |
| L5H | 01-Apr-14 |
| L5J | 01-Jan-15 |
| L5K | 01-Jan-15 |
| L5L | 01-Jan-14 |
| L5M | 01-Jul-13 |
| L5N | 01-Jan-15 |
| L5P | 01-Jul-07 |
| L5R | 01-Jul-13 |
| L5S | 01-Apr-13 |
| L5T | 01-Jan-14 |
| L5V | 01-Jul-13 |
| L5W | 01-Jan-14 |
| L6A | 01-Jan-15 |
| L6B | 01-Oct-14 |
| L6C | 01-Oct-14 |
| L6E | 01-Oct-14 |
| L6G | 01-Oct-14 |
| L6H | 01-Jan-15 |
| L6J | 01-Jan-15 |
| L6K | 01-Jan-15 |
| L6L | 01-Jan-15 |
| L6M | 01-Jan-15 |
| L6P | 01-Apr-14 |
| L6R | 01-Jan-14 |
| L6S | 01-Apr-14 |
| L6T | 01-Jan-14 |
| L6V | 01-Apr-14 |
| L6W | 01-Apr-14 |
| L6X | 01-Jan-15 |
| L6Y | 01-Jan-15 |
| L6Z | 01-Jan-15 |
| L7A | 01-Jan-15 |
| L7B | 01-Jul-14 |
| L7C | 01-Oct-16 |
| L7E | 01-Oct-16 |
| L7G | 01-Jan-15 |
| L7J | 01-Oct-16 |
| L7K | 01-Oct-16 |
| L8B | 01-Jul-17 |
| L8P | 01-Oct-17 |
| L8R | 01-Oct-17 |
| L8S | 01-Oct-17 |
| L9E | 01-Apr-16 |
| L9H | 01-Jan-18 |
| L9J | 01-Jan-16 |

Confidential

1  
2  
3  
4  
5  
6  
7  
8  
9  
10  
11  
12  
13  
14  
15  
16  
17  
18  
19  
20  
21  
22  
23  
24  
25  
26  
27  
28  
29  
30  
31  
32  
33  
34  
35  
36  
37  
38  
39  
40  
41  
42  
43  
44  
45  
46  
47  
48  
49  
50  
51  
52  
53  
54  
55  
56  
57  
58  
59  
60

|     |           |
|-----|-----------|
| L9L | 01-Jan-13 |
| L9M | 01-Apr-16 |
| L9N | 01-Apr-12 |
| L9P | 01-Oct-14 |
| L9R | 01-Jan-14 |
| L9S | 01-Oct-15 |
| L9T | 01-Jan-15 |
| L9V | 01-Oct-16 |
| L9W | 01-Oct-16 |
| L9Y | 01-Jul-16 |
| L9Z | 01-Jul-16 |
| M1B | 01-Apr-14 |
| M1C | 01-Apr-14 |
| M1E | 01-Apr-14 |
| M1G | 01-Apr-14 |
| M1H | 01-Apr-14 |
| M1J | 01-Apr-14 |
| M1K | 01-Apr-14 |
| M1L | 01-Jul-14 |
| M1M | 01-Apr-14 |
| M1N | 01-Jul-14 |
| M1P | 01-Apr-14 |
| M1R | 01-Apr-14 |
| M1S | 01-Apr-14 |
| M1T | 01-Apr-14 |
| M1V | 01-Apr-14 |
| M1W | 01-Apr-14 |
| M1X | 01-Oct-14 |
| M2H | 01-Apr-14 |
| M2J | 01-Apr-14 |
| M2K | 01-Jan-14 |
| M2L | 01-Jan-14 |
| M2M | 01-Apr-14 |
| M2N | 01-Jan-14 |
| M2P | 01-Jan-14 |
| M2R | 01-Oct-15 |
| M3A | 01-Apr-14 |
| M3B | 01-Apr-14 |
| M3C | 01-Apr-14 |
| M3H | 01-Oct-15 |
| M4A | 01-Jul-14 |
| M4B | 01-Jul-14 |
| M4C | 01-Jul-14 |
| M4E | 01-Jul-14 |
| M4G | 01-Apr-14 |
| M4H | 01-Jul-14 |

Confidential



|     |           |
|-----|-----------|
| M4J | 01-Jul-14 |
| M4K | 01-Jul-14 |
| M4L | 01-Jul-14 |
| M4M | 01-Jul-14 |
| M4N | 01-Apr-14 |
| M4P | 01-Apr-14 |
| M4R | 01-Jan-14 |
| M4S | 01-Apr-14 |
| M4T | 01-Apr-14 |
| M4V | 01-Apr-14 |
| M4W | 01-Apr-14 |
| M4X | 01-Apr-14 |
| M4Y | 01-Apr-14 |
| M5A | 01-Apr-14 |
| M5B | 01-Apr-14 |
| M5C | 01-Apr-14 |
| M5E | 01-Apr-14 |
| M5G | 01-Apr-14 |
| M5H | 01-Jul-14 |
| M5J | 01-Apr-14 |
| M5K | 01-Apr-13 |
| M5L | 01-Jul-14 |
| M5M | 01-Apr-14 |
| M5N | 01-Apr-14 |
| M5P | 01-Apr-14 |
| M5R | 01-Apr-14 |
| M5S | 01-Apr-14 |
| M5T | 01-Apr-14 |
| M5V | 01-Apr-14 |
| M5W | 01-Apr-14 |
| M5X | 01-Jul-13 |
| M6C | 01-Apr-14 |
| M6G | 01-Apr-14 |
| M6H | 01-Apr-14 |
| M6J | 01-Apr-14 |
| M6K | 01-Apr-14 |
| M6P | 01-Apr-14 |
| M6R | 01-Apr-14 |
| M6S | 01-Apr-14 |
| M7A | 01-Jan-10 |
| M8V | 01-Apr-14 |
| M8W | 01-Apr-14 |
| M8X | 01-Apr-14 |
| M8Y | 01-Apr-14 |
| M8Z | 01-Apr-14 |
| M9B | 01-Apr-14 |

Confidential

1  
2  
3  
4  
5  
6  
7  
8  
9  
10  
11  
12  
13  
14  
15  
16  
17  
18  
19  
20  
21  
22  
23  
24  
25  
26  
27  
28  
29  
30  
31  
32  
33  
34  
35  
36  
37  
38  
39  
40  
41  
42  
43  
44  
45  
46  
47  
48  
49  
50  
51  
52  
53  
54  
55  
56  
57  
58  
59  
60

|     |           |
|-----|-----------|
| M9C | 01-Apr-14 |
| M9V | 01-Oct-15 |
| N0C | 01-Jul-16 |
| N0G | 01-Jan-17 |
| N0K | 01-Jan-15 |
| N0M | 01-Jan-15 |
| N1A | 01-Apr-17 |
| N1C | 01-Jan-17 |
| N1E | 01-Jan-17 |
| N1G | 01-Jan-17 |
| N1H | 01-Jan-17 |
| N1K | 01-Jan-17 |
| N1L | 01-Jan-17 |
| N1M | 01-Jan-17 |
| N1P | 01-Apr-17 |
| N1R | 01-Apr-17 |
| N1T | 01-Apr-17 |
| N2Z | 01-Oct-09 |
| N3C | 01-Apr-17 |
| N3E | 01-Jan-18 |
| N4G | 01-Oct-13 |
| N4K | 01-Jan-08 |
| N4L | 01-Jan-08 |
| N4N | 01-Oct-09 |
| N4S | 01-Oct-13 |
| N4T | 01-Oct-13 |
| N4V | 01-Oct-13 |
| N4W | 01-Oct-14 |
| N4X | 01-Jan-15 |
| N4Z | 01-Jan-15 |
| N5A | 01-Jan-15 |
| N5C | 01-Oct-13 |
| N5H | 01-Oct-13 |
| N5L | 01-Oct-13 |
| N5P | 01-Oct-13 |
| N5R | 01-Oct-13 |
| N5V | 01-Jul-13 |
| N5W | 01-Jul-13 |
| N5X | 01-Jul-13 |
| N5Y | 01-Jul-13 |
| N5Z | 01-Jul-13 |
| N6A | 01-Oct-13 |
| N6B | 01-Jul-13 |
| N6C | 01-Jul-13 |
| N6E | 01-Jul-13 |
| N6G | 01-Jul-13 |

Confidential

|     |           |
|-----|-----------|
| N6H | 01-Jul-13 |
| N6J | 01-Jul-13 |
| N6K | 01-Jul-13 |
| N6L | 01-Jul-13 |
| N6M | 01-Jul-13 |
| N6N | 01-Oct-13 |
| N6P | 01-Jul-13 |
| N7A | 01-Jan-15 |
| N7G | 01-Oct-13 |
| P0G | 01-Jul-15 |
| P0J | 01-Jul-14 |
| P0K | 01-Jul-14 |
| P0M | 01-Apr-14 |
| P0N | 01-Jul-14 |
| P0P | 01-Jan-14 |
| P0T | 01-Oct-15 |
| P0V | 01-Oct-15 |
| P0W | 01-Oct-15 |
| P0X | 01-Jan-16 |
| P0Y | 01-Jan-16 |
| P2A | 01-Jul-15 |
| P2B | 01-Jul-14 |
| P2N | 01-Jul-14 |
| P3A | 01-Jan-14 |
| P3B | 01-Jan-14 |
| P3C | 01-Jan-14 |
| P3E | 01-Jan-14 |
| P3G | 01-Jan-14 |
| P3L | 01-Jan-14 |
| P3N | 01-Jan-14 |
| P3P | 01-Jan-14 |
| P3Y | 01-Jan-14 |
| P4N | 01-Jul-14 |
| P4P | 01-Jul-14 |
| P4R | 01-Jul-14 |
| P5A | 01-Apr-14 |
| P5E | 01-Apr-14 |
| P5N | 01-Jul-14 |
| P7A | 01-Jan-16 |
| P7B | 01-Oct-15 |
| P7C | 01-Oct-15 |
| P7E | 01-Oct-15 |
| P7G | 01-Oct-15 |
| P7J | 01-Jan-16 |
| P7K | 01-Oct-15 |
| P7L | 01-Oct-15 |

Confidential

1  
2  
3  
4  
5  
6  
7  
8  
9  
10  
11  
12  
13  
14  
15  
16  
17  
18  
19  
20  
21  
22  
23  
24  
25  
26  
27  
28  
29  
30  
31  
32  
33  
34  
35  
36  
37  
38  
39  
40  
41  
42  
43  
44  
45  
46  
47  
48  
49  
50  
51  
52  
53  
54  
55  
56  
57  
58  
59  
60

|     |           |
|-----|-----------|
| P8N | 01-Oct-15 |
| P8T | 01-Oct-14 |
| P9A | 01-Oct-15 |
| P9N | 01-Jan-16 |

Confidential
